# Supplementary material for: Prognostic Significance of Serum Free Amino Acids in Head and Neck Cancers
Source: PubMed Central journal article supplement (PMC6562773; doi:10.3390/cells8050428), 2019-05-09
Supplement: cells-08-00428-s001.pdf [file cells-08-00428-s001.pdf]

Supplementary information for:

## Prognostic significance of serum free amino acids in head and neck cancers

Vit Vsiansky<sup>1\*</sup>, Marketa Svobodova<sup>1,2\*</sup>, Jaromir Gumulec<sup>1,2,3</sup>, Natalia Cernei<sup>3,4</sup>, Dagmar Sterbova<sup>3</sup>, Ondrej Zitka<sup>3,4</sup>, Rom Kostrica<sup>5</sup>, Jan Plzak<sup>6</sup>, Jan Betka<sup>6</sup>, Michal Masarik<sup>1,2,7</sup>, and Martina Raudenska<sup>2\*</sup>

<sup>1</sup> Department of Pathological Physiology, Faculty of Medicine, Masaryk University / Kamenice 5, CZ-625 00 Brno, Czech Republic

<sup>2</sup> Department of Physiology, Faculty of Medicine, Masaryk University / Kamenice 5, CZ-625 00 Brno, Czech Republic

<sup>3</sup> Department of Chemistry and Biochemistry, Mendel University, Zemedelska 1, 613 00 Brno, CZ

<sup>4</sup> Central European Institute of Technology, Brno University of Technology, Technicka 3058/10, CZ-616 00 Brno, Czech Republic

<sup>5</sup> Department of Otorhinolaryngology and Head and Neck Surgery, St. Anne's Faculty Hospital, Pekarska 53, CZ-656 91 Brno, Czech Republic

<sup>6</sup> Department of Otorhinolaryngology and Head and Neck Surgery, University Hospital Motol, First Faculty of Medicine, Charles University, V Uvalu 84, Prague 5, 150 06, Czech Republic

<sup>7</sup> BIOCEV, First Faculty of Medicine, Charles University, Průmyslová 595, 252 50, Vestec, Czech Republic

\* Correspondence: m.raudenska@gmail.com; Tel.: +420-5-4949-8526

**Table S1:** Results of the univariate Cox regression overall survival analysis for clinicopathological parameters. Statistically significant values are written in bold.

|                                                                     | Confidence interval    | P                |
|---------------------------------------------------------------------|------------------------|------------------|
| Age (>Median)                                                       | 0.9823 - 1.036         | 0.525            |
| Sex (Male)                                                          | 0.4438 - 4.495         | 0.559            |
| Grade (High)                                                        | 0.3252 - 2.352         | 0.791            |
| Grade (Intermediate)                                                | 0.2279 - 1.451         | 0.241            |
| Larynx                                                              | 0.4249 - 1.198         | 0.201            |
| Oral Cavity                                                         | 0.8168 - 2.724         | 0.193            |
| <b>Hypopharynx</b>                                                  | <b>1.72 - 5.18</b>     | <b>&gt;0.001</b> |
| <b>Oropharynx</b>                                                   | <b>0.337 - 0.9505</b>  | <b>0.0314</b>    |
| <b>T 3,4 vs. T 1,2</b>                                              | <b>1.003 - 2.659</b>   | <b>0.0486</b>    |
| <b>N 2,3 vs. N 0,1</b>                                              | <b>1.184 - 3.041</b>   | <b>0.00776</b>   |
| M1 vs. M0                                                           | 0.4144 - 4.197         | 0.639            |
| <b>Treatment: Palliative</b>                                        | <b>3.552 - 11.83</b>   | <b>&gt;0.001</b> |
| <b>Treatment: Primary<br/>Radio(chemo)therapy</b>                   | <b>1.067 - 2.72</b>    | <b>0.0258</b>    |
| Treatment: Surgery                                                  | 0.2681 - 1.279         | 0.179            |
| <b>Treatment: Surgery With<br/>Adjuvant<br/>Radio(chemo)therapy</b> | <b>0.1457 - 0.5296</b> | <b>&gt;0.001</b> |

**Table S2:** Results of the univariate Cox regression overall survival analysis for serum amino acid levels. Statistically significant values are written in bold.

|                   | Confidence interval    | P                |
|-------------------|------------------------|------------------|
| Aspartic Acid     | 0.5015 - 1.462         | 0.57             |
| Glutamic Acid     | 0.4724 - 1.199         | 0.232            |
| Asparagine        | 0.8609 - 2.187         | 0.183            |
| Serine            | 0.938 - 2.603          | 0.0865           |
| Glutamine         | 0.7799 - 2.11          | 0.327            |
| Histidine         | 0.3877 - 1.019         | 0.0598           |
| Glycine           | 0.7542 - 2             | 0.409            |
| Threonine         | 0.3814 - 1.272         | 0.239            |
| Citrulline        | 0.3892 - 1.054         | 0.0795           |
| Arginine          | 0.7524 - 2.244         | 0.348            |
| <b>Alanine</b>    | <b>0.2928 - 0.8019</b> | <b>0.00482</b>   |
| Tyrosine          | 0.5309 - 1.368         | 0.508            |
| <b>Cystine</b>    | <b>1.043 - 2.721</b>   | <b>0.0331</b>    |
| Valine            | 0.4348 - 1.108         | 0.126            |
| <b>Methionine</b> | <b>0.2648 - 0.7114</b> | <b>&gt;0.001</b> |
| Tryptophan        | 0.7276 - 2.047         | 0.45             |
| Phenylalanine     | 0.779 - 2.135          | 0.323            |
| Isoleucine        | 0.2994 - 1             | 0.0501           |
| Leucine           | 0.4636 - 1.241         | 0.272            |
| Lysine            | 0.7339 - 2.008         | 0.45             |
| Proline           | 0.433 - 1.108          | 0.126            |

**Table S3:** Results of the multivariate Cox regression overall survival analysis for factors identified as significant in the univariate analyses. Statistically significant values are written in bold. Concordance index of this model was 0.757 (Standard error = 0.027); Likelihood ratio test = 62.4 ( $p > 0.001$ ); Wald test = 61.79 ( $p > 0.001$ ).

|                                                      | Confidence interval     | P             |
|------------------------------------------------------|-------------------------|---------------|
| T 3,4 vs. T 1,2                                      | 0.9483 - 2.6843         | 0.0784        |
| N 2,3 vs. N 0,1                                      | 0.9869 - 3.0374         | 0.0556        |
| Hypopharynx                                          | 0.7103 - 2.6025         | 0.3538        |
| Oropharynx                                           | 0.3910 - 1.3376         | 0.3017        |
| <b>Treatment: Palliative</b>                         | <b>1.2499 - 10.5885</b> | <b>0.0178</b> |
| Treatment: Primary Radio(chemo)therapy               | 0.4655 - 2.8715         | 0.7545        |
| Treatment: Surgery With Adjuvant Radio(chemo)therapy | 0.1375 - 1.0338         | 0.0580        |
| Alanine                                              | 0.4138 - 1.2467         | 0.2395        |
| Cystine                                              | 0.6204 - 1.8679         | 0.7932        |
| <b>Methionine</b>                                    | <b>0.3056 - 0.9013</b>  | <b>0.0195</b> |

**Table S4:** Results of the univariate Cox regression relapse-free survival analysis for clinicopathological parameters.

|                                                         | Confidence interval     | P              |
|---------------------------------------------------------|-------------------------|----------------|
| Age (>Median)                                           | 0.9807 - 1.068          | 0.287          |
| Sex (Male)                                              | 0.2188 - 11.9           | 0.639          |
| Grade (High)                                            | 0.08681 - 1.538         | 0.170          |
| Grade (Intermediate)                                    | 0.11508 - 1.323         | 0.131          |
| Larynx                                                  | 0.6918 - 3.094          | 0.319          |
| <b>Oral Cavity</b>                                      | <b>1.153 - 6.415</b>    | <b>0.0223</b>  |
| Hypopharynx                                             | 0.7505 - 5.472          | 0.163          |
| <b>Oropharynx</b>                                       | <b>0.06907 - 0.5768</b> | <b>0.00292</b> |
| T 3,4 vs. T 1,2                                         | 0.341 - 1.509           | 0.381          |
| N 2,3 vs. N 0,1                                         | 0.3982 - 1.881          | 0.715          |
| M1 vs. M0                                               | 0.1677 - 9.101          | 0.836          |
| Treatment: Palliative                                   | 0.128 - 7.149           | 0.965          |
| <b>Treatment: Primary<br/>Radio(chemo)therapy</b>       | <b>1.17 - 5.359</b>     | <b>0.0181</b>  |
| Treatment: Surgery                                      | 0.1047 - 1.864          | 0.266          |
| Treatment: Surgery With<br>Adjuvant Radio(chemo)therapy | 0.2305 - 1.194          | 0.124          |

**Table S5:** Results of the univariate Cox regression relapse-free survival analysis for serum amino acid levels. Statistically significant values are written in bold.

|                   | Confidence interval     | P             |
|-------------------|-------------------------|---------------|
| Aspartic Acid     | 0.2498 - 1.222          | 0.143         |
| Glutamic Acid     | 0.3578 - 1.583          | 0.454         |
| Asparagine        | 0.4556 - 2.079          | 0.944         |
| Serine            | 0.5217 - 2.902          | 0.636         |
| Glutamine         | 0.3749 - 1.678          | 0.544         |
| Histidine         | 0.4971 - 3.028          | 0.657         |
| Glycine           | 0.3953 - 2.039          | 0.797         |
| <b>Threonine</b>  | <b>0.04956 - 0.8813</b> | <b>0.033</b>  |
| Citrulline        | 0.238 - 1.17            | 0.116         |
| Arginine          | 0.2416 - 2.014          | 0.506         |
| Alanine           | 0.2174 - 1.065          | 0.0711        |
| Tyrosine          | 0.3283 - 1.459          | 0.334         |
| Cystine           | 0.615 - 3.016           | 0.446         |
| Valine            | 0.448 - 2.01            | 0.891         |
| <b>Methionine</b> | <b>0.1726 - 0.8175</b>  | <b>0.0136</b> |
| Tryptophan        | 0.6011 - 3.101          | 0.457         |
| Phenylalanine     | 0.6757 - 3.314          | 0.32          |
| Isoleucine        | 0.269 - 1.645           | 0.377         |
| Leucine           | 0.4292 - 2.216          | 0.952         |
| Lysine            | 0.5153 - 2.523          | 0.746         |
| Proline           | 0.2581 - 1.162          | 0.117         |

**Table S6:** Results of the multivariate Cox regression relapse-free survival analysis for factors identified as significant in the univariate analyses. Concordance index of this model was 0.787 (Standard error = 0.043); Likelihood ratio test = 33.05 ( $p > 0.001$ ); Wald test = 24.63 ( $p > 0.001$ ).

|                                                   | Confidence interval      | P              |
|---------------------------------------------------|--------------------------|----------------|
| <b>Oral Cavity</b>                                | <b>1.49124 - 14.7489</b> | <b>0.00820</b> |
| <b>Oropharynx</b>                                 | <b>0.09951 - 0.9034</b>  | <b>0.03232</b> |
| <b>Treatment: Primary<br/>Radio(chemo)therapy</b> | <b>1.89193 - 13.9992</b> | <b>0.00133</b> |
| Threonine                                         | 0.06630 - 1.2623         | 0.09892        |
| <b>Methionine</b>                                 | <b>0.19240 - 0.9941</b>  | <b>0.04836</b> |
